# Supplementary material for: Auxiliary ligand-directed synthesis of 3D energetic coordination polymer from discrete complex: enhanced energy density, thermal stability and energy performance
Source: Royal Society of Chemistry journal article supplement (doi:10.1039/c8ce01891j), 2018-11-30
Supplement: c8ce01891j1.pdf [file c8ce01891j1.pdf]

# Auxiliary ligand-directed synthesis of 3D energetic coordination polymer from discrete complex: Enhanced energy density, thermal stability and energy performances

*Zhaoqi Guo<sup>\*a</sup>, Yu Wang<sup>a</sup>, Xuemin Liu<sup>b</sup>, Cong Zhang<sup>a</sup>, Xiang Chen<sup>a</sup>, Yazhou Zhang<sup>a</sup>,*

*Haixia Ma<sup>\*a</sup>*

<sup>a</sup>School of Chemical Engineering, Northwest University, Xi'an 710069 Shaanxi, PR China.

<sup>b</sup>Jinxi Industries Group Co., LTD., Taiyuan 030027 Shanxi, PR China..

\*E-mail: guozhaoqi@outlook.com, mahx@nwu.edu.cn

**Table S1.** Selected bond lengths (Å) and bond angles (°) for **1** and **2**.

| <b>Complex 1</b>    |            |                |            |
|---------------------|------------|----------------|------------|
| Cu(1)-O(1)          | 1.9164(18) | Cu(1)-O(1) #1  | 1.9165(18) |
| Cu(1)-O(3)          | 1.9047(18) | Cu(1)-O(3)#1   | 1.9047(18) |
| O(1)-C(7)           | 1.276(3)   | O(2)-C(7)      | 1.239(3)   |
| O(3)-C(1)           | 1.290(3)   | O(4)-N(1)      | 1.216(4)   |
| O(5)-N(1)           | 1.216(3)   | O(6)-N(2)      | 1.221(3)   |
| O(7)-N(2)           | 1.227(3)   | N(1)-C(2)      | 1.459(4)   |
| N(2)-C(4)           | 1.448(4)   | C(1)-C(2)      | 1.422(4)   |
| C(1)-C(6)           | 1.421(4)   | C(2)-C(3)      | 1.361(4)   |
| C(3)-C(4)           | 1.381(4)   | C(4)-C(5)      | 1.374(4)   |
| C(5)-C(6)           | 1.389(4)   | C(6)-C(7)      | 1.494(4)   |
| N(3)-C(8)           | 1.476(4)   | N(3)-C(9)      | 1.466(4)   |
| O(1)-Cu(1)-O(1)#1   | 180.00(12) | C(6)-C(1)-C(2) | 115.5(2)   |
| O(3)#1-Cu(1)-O(1)   | 87.15(8)   | C(1)-C(2)-N(1) | 117.5(2)   |
| O(3)-Cu(1)-O(1)#1   | 87.15(8)   | C(3)-C(2)-N(1) | 117.7(2)   |
| O(3)#1-Cu(1)-O(1)#1 | 92.85(8)   | C(3)-C(2)-C(1) | 124.8(3)   |
| O(3)-Cu(1)-O(1)     | 92.85(8)   | C(2)-C(3)-C(4) | 117.3(3)   |
| O(3)-Cu(1)-O(3)#1   | 180.0      | C(3)-C(4)-N(2) | 119.0(3)   |
| C(7)-O(1)-Cu(1)     | 129.77(18) | C(5)-C(4)-N(2) | 119.7(3)   |
| C(1)-O(3)-Cu(1)     | 125.87(18) | C(5)-C(4)-C(3) | 121.3(3)   |
| O(4)-N(1)-O(5)      | 124.3(3)   | C(4)-C(5)-C(6) | 121.4(3)   |
| O(4)-N(1)-C(2)      | 117.8(3)   | C(1)-C(6)-C(7) | 123.1(2)   |
| O(5)-N(1)-C(2)      | 117.9(3)   | C(5)-C(6)-C(1) | 119.6(2)   |
| O(6)-N(2)-O(7)      | 122.8(3)   | C(5)-C(6)-C(7) | 117.3(2)   |
| O(6)-N(2)-C(4)      | 119.1(3)   | O(1)-C(7)-C(6) | 120.0(2)   |
| O(7)-N(2)-C(4)      | 118.1(3)   | O(2)-C(7)-O(1) | 121.2(3)   |
| O(3)-C(1)-C(2)      | 118.4(2)   | O(2)-C(7)-C(6) | 118.9(2)   |
| O(3)-C(1)-C(6)      | 126.0(2)   | C(9)-N(3)-C(8) | 113.7(2)   |
| <b>Complex 2</b>    |            |                |            |
| Cu(1)-O(1)          | 1.909(2)   | N(3)-C(8)      | 1.318(4)   |
| Cu(1)-O(3)          | 1.900(2)   | N(4)-N(5)      | 1.294(3)   |
| Cu(1)-O(8)          | 1.881(2)   | N(5)-N(6)      | 1.338(4)   |
| Cu(1)-N(3)          | 1.976(2)   | N(6)-Cu(2)#3   | 1.976(2)   |
| Cu(2)-O(2)#1        | 1.971(2)   | C(1)-C(6)      | 1.389(4)   |
| Cu(2)-O(8)          | 1.879(2)   | C(1)-C(7)      | 1.496(4)   |
| Cu(2)-N(4)          | 2.036(2)   | C(2)-C(1)      | 1.438(4)   |

|                     |            |                   |            |
|---------------------|------------|-------------------|------------|
| Cu(2)-N(6)#2        | 1.976(2)   | C(2)-C(3)         | 1.436(4)   |
| O(1)-C(7)           | 1.266(4)   | C(3)-N(1)         | 1.462(4)   |
| O(2)-Cu(2)#1        | 1.971(2)   | C(3)-C(4)         | 1.371(4)   |
| O(3)-C(2)           | 1.280(3)   | C(5)-N(2)         | 1.467(4)   |
| O(4)-N(1)           | 1.226(4)   | C(5)-C(4)         | 1.389(5)   |
| O(5)-N(1)           | 1.224(4)   | C(6)-C(5)         | 1.379(5)   |
| N(2)-O(6)           | 1.216(5)   | C(7)-O(2)         | 1.248(3)   |
| N(2)-O(7)           | 1.208(4)   | C(8)-N(6)         | 1.337(4)   |
| N(3)-N(4)           | 1.351(3)   |                   |            |
| O(1)-Cu(1)-N(3)     | 173.59(11) | N(3)-N(4)-Cu(2)   | 120.45(17) |
| O(3)-Cu(1)-O(1)     | 92.75(9)   | N(5)-N(4)-Cu(2)   | 127.9(2)   |
| O(3)-Cu(1)-N(3)     | 89.99(9)   | N(5)-N(4)-N(3)    | 110.0(2)   |
| O(8)-Cu(1)-O(1)     | 91.71(9)   | N(4)-N(5)-N(6)    | 108.0(2)   |
| O(8)-Cu(1)-O(3)     | 174.72(9)  | N(5)-N(6)-Cu(2)#3 | 117.21(18) |
| O(8)-Cu(1)-N(3)     | 85.29(9)   | C(8)-N(6)-Cu(2)#3 | 134.1(2)   |
| O(2)#1-Cu(2)-N(4)   | 176.55(11) | C(8)-N(6)-N(5)    | 106.8(2)   |
| O(2)#1-Cu(2)-N(6)#2 | 88.12(10)  | C(2)-C(1)-C(7)    | 122.0(3)   |
| O(8)-Cu(2)-O(2)#1   | 95.98(9)   | C(6)-C(1)-C(2)    | 121.1(3)   |
| O(8)-Cu(2)-N(4)     | 83.70(9)   | C(6)-C(1)-C(7)    | 116.8(3)   |
| O(8)-Cu(2)-N(6)#2   | 174.60(11) | O(3)-C(2)-C(1)    | 125.6(3)   |
| N(6)#2-Cu(2)-N4     | 92.42(10)  | O(3)-C(2)-C(3)    | 119.4(3)   |
| C(7)-O(1)-Cu(1)     | 131.04(19) | C(3)-C(2)-C(1)    | 115.0(3)   |
| C(7)-O(2)-Cu(2)#1   | 131.2(2)   | C(2)-C(3)-N(1)    | 119.4(3)   |
| C(2)-O(3)-Cu(1)     | 127.55(19) | C(4)-C(3)-N(1)    | 116.7(3)   |
| Cu(2)-O(8)-Cu(1)    | 129.35(11) | C(4)-C(3)-C(2)    | 123.9(3)   |
| O(4)-N(1)-C(3)      | 120.0(3)   | C(3)-C(4)-C(5)    | 117.9(3)   |
| O(5)-N(1)-O(4)      | 122.6(3)   | C(4)-C(5)-N(2)    | 118.4(3)   |
| O(5)-N(1)-C(3)      | 117.3(3)   | C(6)-C(5)-N(2)    | 119.5(3)   |
| O(6)-N(2)-C(5)      | 117.7(3)   | C(6)-C(5)-C(4)    | 122.0(3)   |
| O(7)-N(2)-C(5)      | 118.9(3)   | C(5)-C(6)-C(1)    | 120.0(3)   |
| O(7)-N(2)-O(6)      | 123.4(3)   | O(1)-C(7)-C(1)    | 120.9(3)   |
| N(4)-N(3)-Cu(1)     | 120.86(18) | O(2)-C(7)-O(1)    | 121.9(3)   |
| C(8)-N(3)-Cu(1)     | 132.8(2)   | O(2)-C(7)-C(1)    | 117.2(3)   |
| C(8)-N(3)-N(4)      | 105.6(2)   | N(3)-C(8)-N(6)    | 109.6(3)   |

**Table S2.** Hydrogen bonding distances and bond angles (Å, °) for **1**.

| Donor-H...Acceptor | D - H      | H...A      | D...A      | D - H...A    |
|--------------------|------------|------------|------------|--------------|
| N3-H3A...O2        | 0.8896(27) | 1.8751(27) | 2.7645(38) | 178.837(169) |
| N3-H3B...O2        | 0.8907(24) | 2.2422(20) | 2.8914(30) | 129.466(147) |

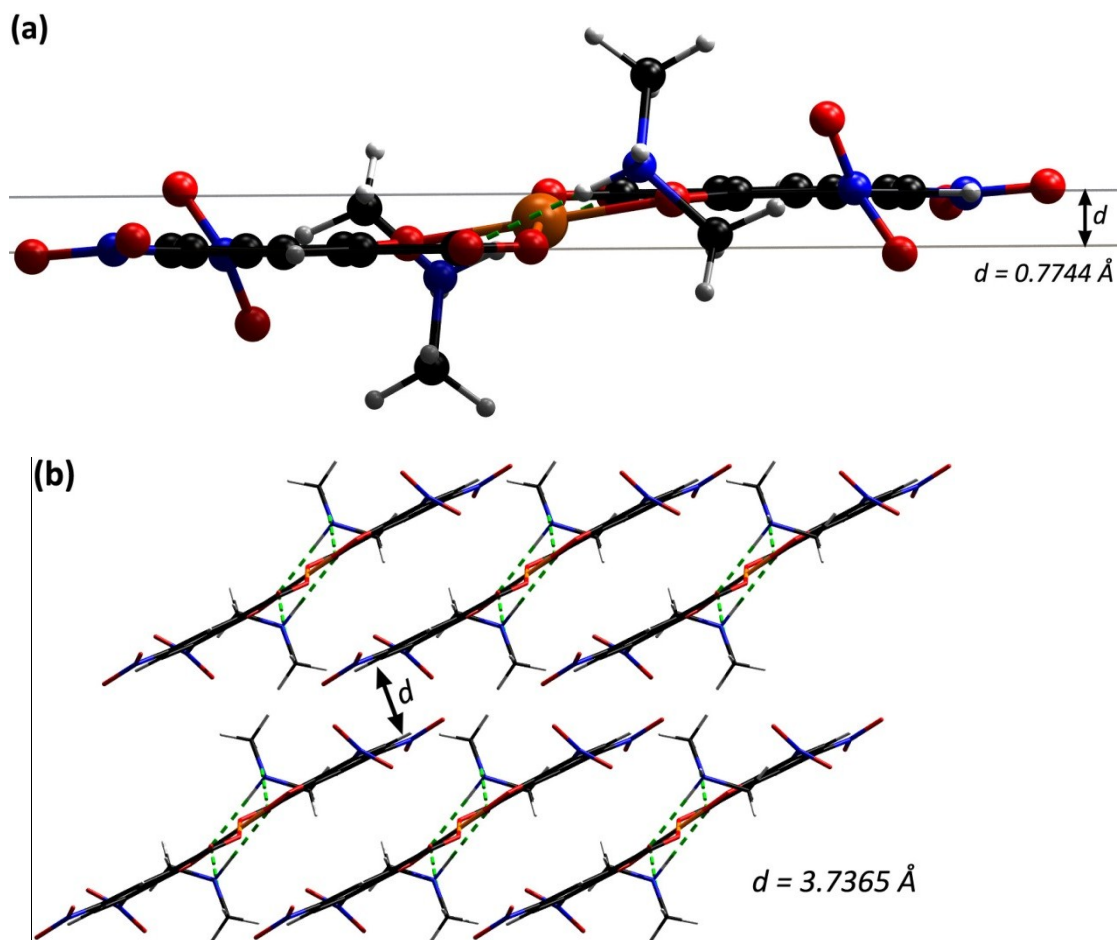

**Figure S1.** Side view of the discrete complex (a) and side view of one dimensional supramolecular structure of **1** (b)

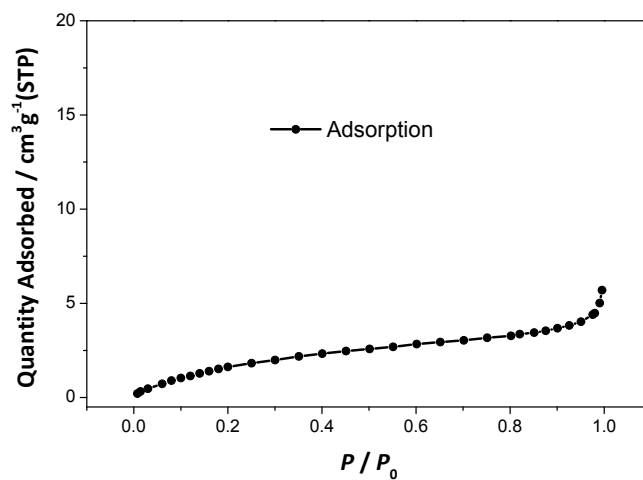

**Figure S2.** Nitrogen sorption curve of complex **2**.

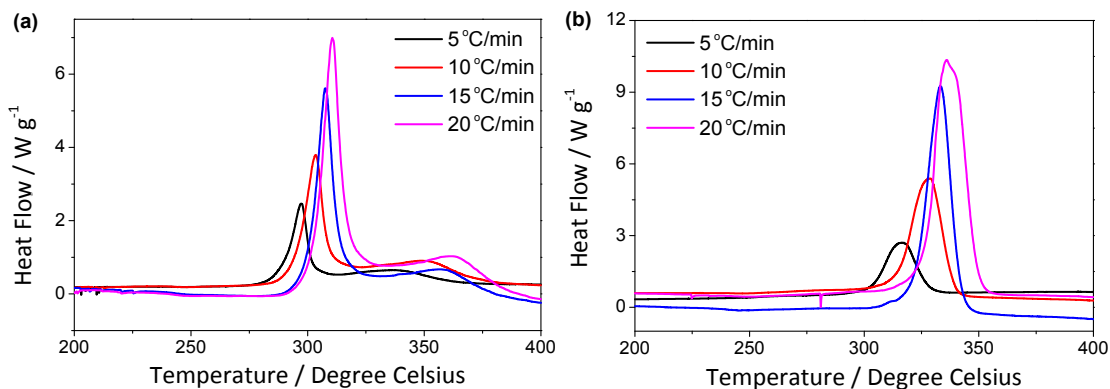

**Figure S3.** DSC curves of **1** (a) and **2** (b) at four different heating rates of 5, 10, 15, 20 °C/min.

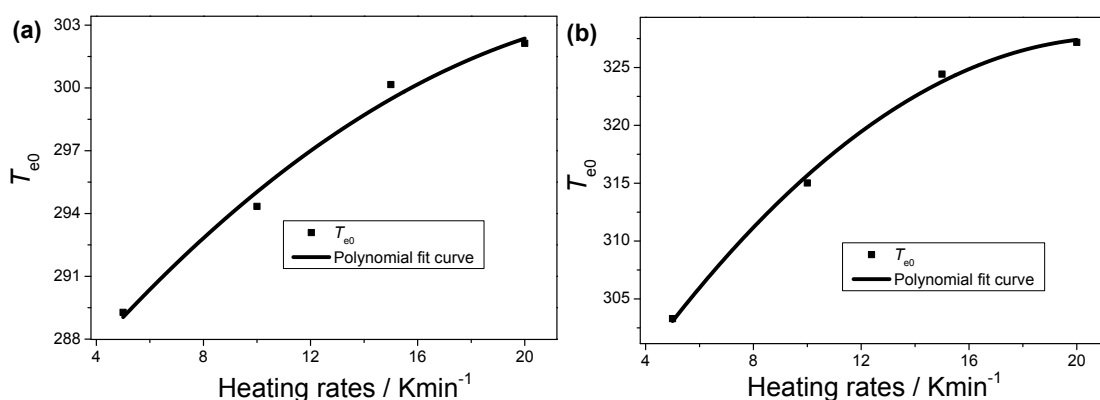

**Figure S4.** Polynomial fit curves of **1** (a) and **2** (b) for calculating self-accelerating decomposition temperature.

**Table S3.** Detonation Products of **1** and **2** predicted by EXPLO5

| <b>1</b>                       |              |              |         | <b>2</b>                       |              |              |         |
|--------------------------------|--------------|--------------|---------|--------------------------------|--------------|--------------|---------|
| Detonation products            | mol/mol      | mol/kg       | Mol %   | Detonation products            | mol/mol      | mol/kg       | Mol %   |
| C(d)                           | 1.402267E01  | 2.306648E01  | 46.0720 | C(d)                           | 4.197973E00  | 9.535213E00  | 28.6120 |
| H <sub>2</sub> O               | 8.084113E00  | 1.329790E01  | 26.5606 | N <sub>2</sub>                 | 2.985538E00  | 6.781305E00  | 20.3485 |
| N <sub>2</sub>                 | 2.917767E00  | 4.799559E00  | 9.5864  | Cu(l)                          | 2.000000E00  | 4.542769E00  | 13.6314 |
| CO <sub>2</sub>                | 1.721872E00  | 2.832380E00  | 5.6573  | CO <sub>2</sub>                | 1.779698E00  | 4.042380E00  | 12.1299 |
| CO                             | 1.235419E00  | 2.032192E00  | 4.0590  | H <sub>2</sub> O               | 1.644891E00  | 3.736181E00  | 11.2111 |
| Cu(l)                          | 1.000000E00  | 1.644942E00  | 3.2855  | CO                             | 1.216321E00  | 2.762734E00  | 8.2901  |
| CH <sub>2</sub> O <sub>2</sub> | 6.178591E-01 | 1.016343E00  | 2.0300  | CH <sub>2</sub> O <sub>2</sub> | 7.895664E-01 | 1.793409E00  | 5.3814  |
| H <sub>2</sub>                 | 3.209896E-01 | 5.280094E-01 | 1.0546  | H <sub>2</sub>                 | 2.477643E-02 | 5.627682E-02 | 0.1689  |
| CH <sub>4</sub>                | 3.044221E-01 | 5.007569E-01 | 1.0002  | NH <sub>3</sub>                | 1.741347E-02 | 3.955268E-02 | 0.1187  |
| NH <sub>3</sub>                | 1.580286E-01 | 2.599480E-01 | 0.5192  | HCN                            | 1.130091E-02 | 2.566871E-02 | 0.0770  |
| C <sub>2</sub> H <sub>6</sub>  | 3.696948E-02 | 6.081267E-02 | 0.1215  | CH <sub>4</sub>                | 3.426248E-03 | 7.782327E-03 | 0.0234  |
| C <sub>2</sub> H <sub>4</sub>  | 7.512026E-03 | 1.235685E-02 | 0.0247  | C <sub>2</sub> H <sub>4</sub>  | 5.437066E-04 | 1.234967E-03 | 0.0037  |
| HCN                            | 6.411212E-03 | 1.054607E-02 | 0.0211  | C <sub>2</sub> H <sub>6</sub>  | 2.393438E-04 | 5.436420E-04 | 0.0016  |
| C(gr)                          | 1.381486E-03 | 2.272465E-03 | 0.0045  | CH <sub>3</sub> OH             | 1.127736E-04 | 2.561522E-04 | 0.0008  |

|                               |              |              |        |                               |              |              |        |
|-------------------------------|--------------|--------------|--------|-------------------------------|--------------|--------------|--------|
| CH <sub>3</sub> OH            | 9.793492E-04 | 1.610973E-03 | 0.0032 | NO                            | 1.087433E-04 | 2.469978E-04 | 0.0007 |
| CH <sub>2</sub> O             | 2.263054E-05 | 3.722593E-05 | 0.0001 | H                             | 5.084138E-05 | 1.154803E-04 | 0.0003 |
| H                             | 1.552765E-05 | 2.554208E-05 | 0.0001 | NH <sub>2</sub>               | 3.318150E-05 | 7.536796E-05 | 0.0002 |
| NH <sub>2</sub>               | 8.455732E-06 | 1.390919E-05 | 0.0000 | N <sub>2</sub> H <sub>4</sub> | 2.066034E-05 | 4.692758E-05 | 0.0001 |
| N <sub>2</sub> H <sub>4</sub> | 6.864814E-06 | 1.129222E-05 | 0.0000 | CNO                           | 2.018195E-05 | 4.584098E-05 | 0.0001 |
| CHNO                          | 2.697322E-06 | 4.436939E-06 | 0.0000 | CH <sub>2</sub> O             | 9.262425E-06 | 2.103853E-05 | 0.0001 |
| NO                            | 1.071993E-06 | 1.763367E-06 | 0.0000 | CHNO                          | 4.891444E-06 | 1.111035E-05 | 0.0000 |
| CNO                           | 8.256931E-08 | 1.358218E-07 | 0.0000 | N                             | 8.217843E-07 | 1.866589E-06 | 0.0000 |
| Cu                            | 9.323864E-09 | 1.533722E-08 | 0.0000 | NO <sub>2</sub>               | 4.552569E-07 | 1.034064E-06 | 0.0000 |
| N                             | 1.080368E-09 | 1.777144E-09 | 0.0000 | Cu                            | 2.100433E-07 | 4.770893E-07 | 0.0000 |
| N <sub>2</sub> O              | 7.620254E-10 | 1.253488E-09 | 0.0000 | N <sub>2</sub> O              | 1.859664E-07 | 4.224013E-07 | 0.0000 |
| Cu(s)                         | 1.670430E-10 | 2.747761E-10 | 0.0000 | Cu(s)                         | 4.439412E-10 | 1.008361E-09 | 0.0000 |
| NO <sub>2</sub>               | 1.273661E-10 | 2.095099E-10 | 0.0000 | C(gr)                         | 3.834479E-10 | 8.709578E-10 | 0.0000 |
| Cu(OH) <sub>2</sub> (s)       | 6.189807E-12 | 1.018188E-11 | 0.0000 | Cu <sub>2</sub> O(l)          | 7.820999E-11 | 1.776450E-10 | 0.0000 |
| Cu <sub>2</sub> O(l)          | 4.426277E-12 | 7.280970E-12 | 0.0000 | CuO(s)                        | 1.679147E-11 | 3.813989E-11 | 0.0000 |
| CuO(s)                        | 1.694401E-12 | 2.787192E-12 | 0.0000 | Cu(OH) <sub>2</sub> (s)       | 9.640567E-12 | 2.189744E-11 | 0.0000 |
| Cu <sub>2</sub> O(s)          | 9.248207E-13 | 1.521277E-12 | 0.0000 | CuO                           | 7.385997E-12 | 1.677644E-11 | 0.0000 |
| CuO                           | 1.188547E-14 | 1.955092E-14 | 0.0000 | Cu <sub>2</sub> O(s)          | 7.051131E-12 | 1.601583E-11 | 0.0000 |

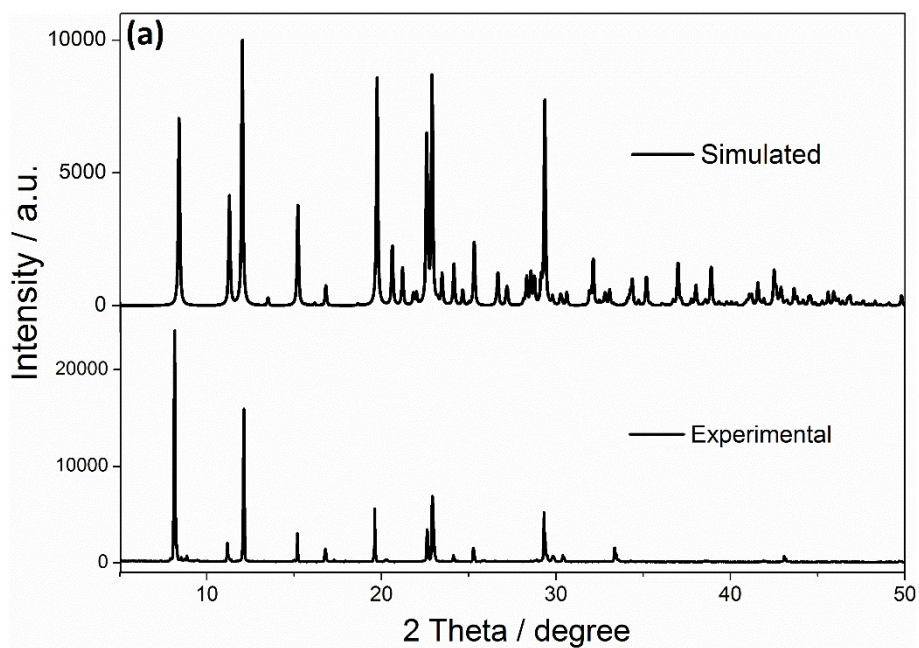

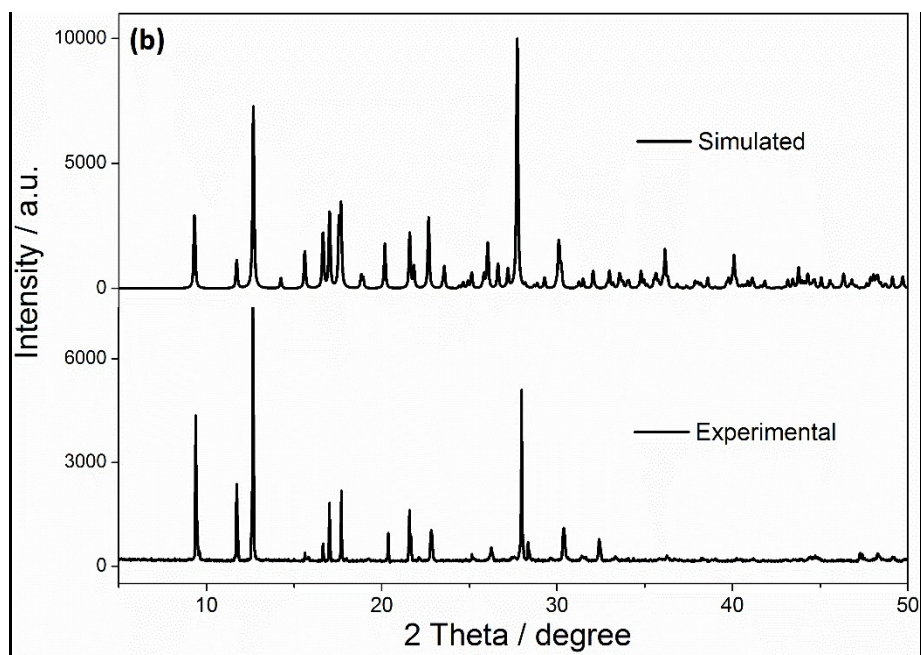

**Figure S5.** PXR D pattern of **1** (a) and **2** (b).
